# Supplementary material for: The advanced lung cancer inflammation index predicts short and long-term outcomes in patients with colorectal cancer following surgical resection: a retrospective study
Source: PeerJ. 2020 Oct 8;8:e10100. doi: 10.7717/peerj.10100 (PMC7548071; doi:10.7717/peerj.10100)
Supplement: Supplemental Information 1 [file peerj-08-10100-s001.xlsx]

## Sheet: 因子表
patients	Gender(1.male,2.female)	Age(60)	Preoperative metastasis	OS(1.death)	follow-up time(OS)	DFS(1.death)	follow-up time(DFS)	NLR（2.23）	PLR（162.33）	PNI(49.2)	CEA分类（1-正常，2-高）	TNM	T(1.T1-2,2.T3-4)	N	Surgical approach	Tumor location	Perineural invasion(1.positive)	Vascular invasion(1.positive)	Macroscopic type(1.Protrude type,2.Infiltrating type,3.Ulcerative type	Histological type(1.poor)	Tumor size(1.<5cm;2.≥5cm）	BMI(1.low，2.normal，3.high）	ALB(1.low,2.high)	ALI(male:31.61,female:24.45)(1.low,2.high)	complication(0No,1Yes)	Clavien-Dindo	Postoperative chemotherapy(0,No,1,Yes)
1	1	2	0	0	69	0	69	1	1	1	2	3	2	1	1	1	0	1	3	2	2	3	2	2	1	1	1
2	1	1	0	0	66	0	66	1	1	1	1	3	2	2	2	1	0	0	2	1	2	1	2	2	0	0	0
3	2	1	0	1	31	1	8	1	1	2	1	3	2	2	2	1	1	1	3	1	1	2	2	2	0	0	0
4	1	2	0	0	77	0	77	2	1	1	2	3	2	1	2	1	1	1	3	2	1	2	2	1	0	0	0
5	1	2	0	0	58	0	58	2	1	1	2	2	2	0	2	1	0	0	3	1	2	2	2	1	0	0	1
6	2	1	0	0	68	1	37	1	1	2	1	2	2	0	2	2	0	0	1	2	2	1	2	2	0	0	1
7	1	2	0	1	17	1	12	2	1	1	2	3	2	1	2	2	0	0	3	2	1	1	1	1	1	1	1
8	1	1	1	1	15	1	11	2	1	1	2	4	2	0	1	1	1	1	3	2	1	2	1	1	0	0	1
9	1	1	0	0	61	0	61	1	1	2	1	1	1	0	2	2	0	0	3	2	1	3	2	2	0	0	0
10	1	2	1	1	8	1	6	1	1	1	1	4	2	0	1	2	0	0	1	2	2	1	2	1	0	0	0
11	2	2	0	0	63	0	63	1	1	1	1	2	2	0	2	2	0	0	2	2	2	2	2	2	0	0	0
12	2	1	0	1	33	1	20	1	1	2	1	3	1	1	1	1	1	1	3	2	1	2	2	2	0	0	1
13	2	2	0	0	60	0	60	2	1	1	1	2	2	0	2	1	0	0	3	2	1	2	2	2	0	0	1
14	1	1	0	0	69	0	69	2	1	2	1	3	2	1	2	2	0	0	3	2	1	2	2	2	0	0	1
15	1	2	0	0	70	0	70	2	2	1	2	2	2	0	1	2	0	1	1	2	2	3	1	1	0	0	1
16	1	2	0	1	68	1	68	2	2	1	1	1	1	0	1	2	0	0	1	2	2	1	1	1	1	2	0
17	1	1	0	0	58	0	58	2	2	2	2	2	2	0	2	1	0	0	2	2	1	2	2	2	0	0	1
18	1	1	0	1	20	1	13	2	2	1	2	3	2	1	1	2	0	0	3	2	2	2	2	1	0	0	1
19	1	1	0	0	71	0	71	2	2	1	1	3	2	2	1	2	0	0	3	1	2	1	1	1	0	0	0
20	1	2	0	1	16	1	14	2	2	1	2	3	1	2	2	1	0	0	3	2	2	1	1	1	0	0	0
21	2	2	0	1	23	1	18	1	1	2	1	3	2	2	2	1	1	0	3	2	1	2	2	2	0	0	1
22	2	1	0	0	77	0	77	1	1	1	1	3	2	1	2	2	0	0	2	2	1	3	2	2	0	0	0
23	2	1	0	0	76	0	76	1	1	2	1	1	1	0	2	1	0	0	2	2	2	1	2	2	0	0	0
24	1	2	0	0	62	0	62	2	1	1	2	2	2	0	2	2	0	0	1	2	2	2	1	1	0	0	1
25	1	1	0	0	64	0	64	1	1	2	1	2	2	0	1	2	0	0	1	1	2	2	2	2	0	0	0
26	2	1	0	0	61	0	61	2	1	1	1	2	2	0	1	2	0	0	3	2	1	2	2	2	0	0	1
27	1	1	0	0	60	0	60	1	2	2	1	2	2	0	2	1	0	0	3	2	2	2	2	2	0	0	1
28	1	1	0	0	61	0	61	2	2	1	1	1	1	0	2	2	0	0	3	2	2	3	2	1	0	0	1
29	1	2	0	1	24	1	24	1	1	2	1	3	1	2	1	1	0	0	3	2	1	3	2	2	0	0	0
30	1	2	0	0	63	0	63	1	1	1	1	1	1	0	2	2	0	0	1	2	1	3	1	2	0	0	0
31	1	1	0	0	61	0	61	1	1	2	1	1	1	0	2	2	0	0	1	2	1	3	2	2	0	0	1
32	2	2	0	0	69	0	69	1	1	2	2	3	2	1	1	2	0	0	3	2	2	3	2	2	0	0	0
33	2	2	0	0	69	0	69	1	1	2	1	3	2	1	1	2	0	1	3	2	1	3	2	2	0	0	1
34	1	1	1	0	67	0	2	1	1	1	1	4	2	0	1	2	0	0	1	2	2	2	2	2	0	0	1
35	2	2	0	0	65	0	65	1	1	1	1	1	1	0	2	2	0	0	3	2	1	2	2	2	0	0	0
36	1	1	0	0	61	0	61	2	1	1	1	2	2	0	1	1	0	0	3	2	2	2	2	2	0	0	0
37	2	2	1	0	72	0	72	1	1	1	2	4	2	0	1	2	0	0	3	2	1	2	1	2	1	1	0
38	2	2	0	1	12	1	12	1	1	1	2	3	2	2	1	2	0	1	3	2	2	2	2	2	0	0	0
39	2	2	0	1	33	1	29	1	1	1	1	1	1	0	2	1	0	0	3	2	1	3	2	2	0	0	0
40	2	1	1	1	42	1	26	2	1	1	2	4	2	0	2	2	0	0	1	2	2	2	2	2	0	0	1
41	1	1	0	0	69	0	69	1	1	1	1	1	1	0	1	1	0	0	1	2	2	2	1	2	1	2	0
42	2	1	0	0	79	0	79	2	2	1	2	2	2	0	1	2	0	0	1	2	2	1	1	1	0	0	1
43	1	2	0	1	57	1	57	2	1	1	1	1	1	0	2	1	0	0	1	2	1	1	2	1	0	0	0
44	1	1	0	1	53	1	41	2	1	2	2	3	2	1	2	2	1	1	3	2	2	1	2	1	0	0	1
45	1	2	1	1	59	1	59	2	1	2	2	4	2	2	1	1	0	1	3	2	2	2	2	1	0	0	1
46	1	2	0	1	72	1	72	1	1	2	1	2	2	0	2	2	0	0	3	2	2	1	2	2	0	0	1
47	2	2	1	1	11	1	8	1	1	1	1	4	2	2	2	1	0	1	1	2	1	3	1	2	0	0	1
48	1	1	0	0	65	0	65	1	1	2	1	3	2	1	2	1	0	0	3	2	1	2	2	2	0	0	0
49	1	2	0	0	77	0	77	1	1	1	1	2	2	0	2	2	0	0	3	2	2	2	1	2	1	2	0
50	1	1	0	0	79	0	79	1	1	2	1	2	2	0	1	1	0	0	3	2	1	2	2	2	0	0	0
51	2	2	0	0	59	0	59	1	1	2	1	3	2	1	1	1	1	1	3	2	2	3	2	2	0	0	0
52	2	1	0	1	20	1	15	1	1	2	1	3	2	1	2	2	0	0	1	2	1	2	1	2	0	0	1
53	2	1	0	0	58	0	58	1	1	1	2	2	2	0	1	2	0	0	1	2	1	2	2	2	0	0	0
54	1	2	0	1	23	1	15	1	1	1	1	1	1	0	2	1	0	0	3	2	2	2	1	2	0	0	0
55	2	2	0	0	68	0	68	1	1	2	1	1	1	0	2	1	0	0	3	2	1	2	2	2	0	0	1
56	2	1	0	0	60	0	60	1	1	2	2	2	2	0	2	1	0	0	3	2	1	2	2	2	0	0	0
57	1	1	0	0	75	0	75	1	1	1	1	2	2	0	1	2	0	0	1	2	2	2	2	2	0	0	1
58	2	2	0	0	66	0	66	1	1	2	2	2	2	0	1	1	0	0	3	2	1	2	2	2	0	0	0
59	2	2	0	1	29	1	22	1	1	1	2	3	2	2	1	2	0	0	2	2	1	2	2	2	0	0	0
60	1	2	0	0	69	0	69	1	1	2	1	3	2	1	2	1	0	0	3	2	1	3	2	2	0	0	1
61	1	1	0	1	33	1	25	1	1	1	1	3	2	1	2	1	0	0	3	2	2	3	2	2	0	0	1
62	1	1	0	0	60	0	60	1	1	2	2	3	2	1	2	1	0	0	1	2	1	2	2	2	0	0	1
63	1	2	0	0	58	0	58	1	1	2	1	2	2	0	2	1	0	0	3	2	1	2	2	2	0	0	1
64	1	2	0	1	30	1	13	2	1	1	1	3	2	1	2	1	0	0	3	2	2	2	1	1	0	0	0
65	1	1	0	1	57	1	24	1	1	2	2	3	2	1	1	1	0	0	3	1	2	2	2	2	1	1	1
66	1	2	0	1	39	1	31	1	1	1	1	1	1	0	2	1	0	0	3	2	1	2	1	2	0	0	0
67	2	1	0	1	23	1	23	1	1	1	2	3	2	2	2	2	0	0	2	2	2	2	2	2	0	0	1
68	1	1	0	0	74	0	74	1	1	2	2	3	2	1	1	2	0	0	3	1	1	2	2	2	0	0	1
69	1	1	0	1	57	1	57	1	1	2	1	2	2	0	2	1	0	0	3	2	1	2	2	2	0	0	1
70	1	2	0	1	17	1	17	2	2	1	2	3	2	2	2	2	0	0	3	2	2	2	1	1	0	0	0
71	1	1	0	0	68	0	68	1	1	1	1	2	2	0	2	2	1	1	3	2	1	3	2	2	0	0	1
72	2	2	0	0	74	0	74	1	1	2	1	2	2	0	2	1	0	0	2	2	1	3	2	2	0	0	1
73	2	1	0	0	61	0	61	2	1	2	1	1	1	0	2	1	1	0	3	2	1	1	2	2	0	0	0
74	1	2	0	0	68	0	68	1	1	1	1	1	1	0	2	2	0	0	3	2	1	1	1	1	0	0	0
75	2	1	0	1	27	1	14	1	1	2	2	3	2	1	2	2	0	0	3	2	1	3	2	2	0	0	1
76	1	1	0	0	72	0	72	1	1	1	2	3	2	1	2	2	0	0	3	2	2	2	2	2	0	0	1
77	1	1	1	0	68	0	68	1	1	1	1	4	2	1	2	2	0	0	3	1	1	1	2	2	0	0	0
78	1	1	0	0	77	0	77	2	1	1	1	2	2	0	1	1	0	0	2	2	1	1	2	1	0	0	1
79	1	1	0	0	62	0	62	1	1	2	1	2	2	0	1	1	0	0	3	2	1	3	2	2	0	0	1
80	1	2	0	0	63	0	63	1	1	2	2	3	1	1	1	1	0	0	1	2	2	3	2	2	0	0	1
81	1	2	0	0	74	0	74	1	1	1	1	2	2	0	2	1	0	0	3	2	1	2	2	2	0	0	0
82	1	2	0	0	73	0	73	1	1	2	1	2	2	0	2	2	0	0	1	2	1	3	2	2	0	0	0
83	1	2	0	0	62	0	62	1	1	2	1	2	2	0	1	2	0	0	2	2	1	2	2	2	1	2	0
84	2	1	0	1	28	1	17	1	2	1	1	3	2	1	2	2	0	0	2	1	1	1	1	2	0	0	1
85	2	2	0	0	71	0	71	1	1	2	2	3	2	2	1	1	0	0	3	2	2	3	2	2	0	0	0
86	2	1	0	0	68	0	68	1	1	1	1	1	1	0	2	2	0	0	3	2	2	2	2	2	0	0	0
87	2	2	0	0	74	0	74	2	1	2	1	1	1	0	2	1	0	0	3	2	1	3	2	2	0	0	0
88	2	1	1	1	26	1	20	1	2	1	1	4	2	0	2	1	0	0	3	2	1	2	2	2	0	0	1
89	2	2	0	1	32	1	32	1	2	1	2	3	2	1	1	1	0	0	2	2	2	1	2	2	0	0	1
90	1	1	0	0	73	0	73	1	2	1	2	2	2	0	1	2	0	0	3	2	1	2	2	2	0	0	1
91	2	2	0	0	68	0	68	1	1	2	1	1	1	0	2	1	0	0	3	2	1	3	1	2	0	0	0
92	1	2	0	0	66	0	66	2	1	1	2	2	2	0	2	1	0	0	3	2	2	2	2	1	0	0	0
93	2	2	0	0	80	0	80	1	1	1	1	1	1	0	2	1	0	0	3	2	2	2	2	2	1	3	0
94	1	2	0	1	34	1	26	1	1	1	2	2	2	0	2	1	0	0	3	1	2	2	2	2	0	0	0
95	1	1	0	0	59	1	6	1	2	2	2	3	2	1	2	2	0	0	3	2	1	2	2	2	0	0	1
96	1	1	0	0	62	0	62	1	1	1	2	2	2	0	2	1	0	0	2	2	2	1	2	2	0	0	1
97	1	2	0	0	64	0	64	1	2	1	2	3	2	2	2	1	0	0	3	2	2	3	2	2	0	0	1
98	2	2	0	1	20	1	15	1	1	2	1	3	2	2	1	1	0	0	3	2	2	2	2	2	1	4	0
99	1	2	0	1	26	1	18	1	1	1	2	3	1	1	2	1	0	0	3	2	1	2	2	2	0	0	1
100	2	1	0	1	26	1	26	1	2	1	2	2	2	0	2	1	0	0	3	2	1	2	1	2	0	0	0
101	2	1	0	0	61	0	61	1	2	2	1	2	2	0	2	2	0	0	3	2	2	3	2	2	1	2	1
102	1	1	0	0	62	0	62	1	1	2	1	2	2	0	2	2	0	0	3	2	2	2	2	2	0	0	1
103	2	2	0	1	45	1	35	2	1	1	1	1	1	0	1	2	0	0	2	2	2	2	1	1	0	0	0
104	1	1	0	0	64	0	64	1	1	1	1	3	2	1	2	1	0	0	3	2	2	3	2	2	0	0	1
105	2	2	0	0	71	0	71	2	2	1	2	2	2	0	1	2	0	0	3	2	1	1	2	2	0	0	0
106	1	2	0	0	75	0	75	1	1	1	2	3	2	1	2	2	0	0	3	2	2	2	1	2	0	0	0
107	1	1	0	0	68	0	68	2	1	1	1	3	2	1	2	2	0	0	3	2	1	3	2	2	0	0	0
108	2	1	0	0	63	0	63	2	2	1	1	3	2	2	2	2	0	0	1	1	1	2	2	2	0	0	0
109	1	1	0	0	65	0	65	1	1	2	1	3	1	1	2	1	0	0	3	2	1	2	2	2	0	0	0
110	1	2	0	0	66	0	66	1	2	1	2	2	2	0	2	1	1	0	3	2	1	2	2	2	0	0	1
111	2	1	0	0	64	0	64	2	2	2	2	3	2	1	2	1	0	0	3	2	1	2	2	2	0	0	1
112	2	1	0	1	18	1	17	2	1	1	1	3	2	2	2	1	0	0	1	2	2	3	2	2	0	0	1
113	1	1	0	0	60	0	60	2	2	1	1	2	2	0	2	1	0	1	3	2	2	2	2	2	0	0	1
114	2	2	0	1	32	1	27	2	1	1	1	2	2	0	1	2	0	0	3	2	2	3	2	2	0	0	1
115	2	2	0	0	59	0	59	2	2	1	1	3	2	1	1	2	1	1	3	2	1	3	2	2	0	0	1
116	2	2	0	0	58	0	58	2	2	1	2	1	1	0	1	2	0	0	2	2	2	3	1	2	0	0	0
117	1	2	0	1	12	1	12	2	1	1	1	1	1	0	2	1	0	0	3	2	1	1	2	1	0	0	0
118	2	1	0	0	59	0	59	2	1	1	1	2	2	0	2	1	0	1	2	2	1	1	2	2	0	0	1
119	2	1	0	1	12	1	9	1	1	2	1	2	2	0	1	1	0	0	3	2	2	2	2	2	0	0	0
120	2	2	0	0	60	0	60	2	1	1	2	3	1	1	2	2	0	0	3	2	2	2	2	2	0	0	0
121	1	2	1	1	16	1	12	2	2	1	1	4	2	2	1	2	0	0	3	2	1	2	1	1	0	0	0
122	2	1	0	0	76	0	76	2	1	1	2	1	1	0	2	1	0	0	2	1	1	2	2	2	0	0	0
123	1	2	0	0	68	1	68	2	2	1	1	3	2	1	1	2	1	1	3	2	2	2	1	1	0	0	0
124	1	1	0	0	78	0	78	2	2	2	1	1	1	0	2	2	0	0	3	2	1	2	2	2	0	0	0
125	1	1	0	0	64	0	64	2	1	1	1	2	2	0	2	2	0	0	3	2	2	2	2	1	0	0	1
126	1	2	0	1	34	1	32	2	2	1	2	3	2	1	1	2	0	0	3	2	2	3	1	2	0	0	1
127	2	2	0	1	17	1	17	1	2	2	2	3	1	2	1	2	0	0	3	1	2	2	2	2	0	0	0
128	1	1	0	0	62	0	10	2	2	1	1	3	2	1	1	2	0	0	3	2	2	1	1	1	0	0	0
129	1	2	0	0	66	0	66	2	2	1	1	2	2	0	2	2	0	0	3	2	1	2	1	1	0	0	0
130	2	1	0	0	75	0	75	2	2	1	1	2	2	0	1	2	0	0	3	2	2	1	1	1	0	0	1
131	1	1	0	1	32	1	26	2	2	1	1	2	2	0	1	2	0	0	3	2	2	2	1	1	0	0	1
132	2	1	0	0	61	0	61	2	2	1	1	1	1	0	1	2	0	0	2	1	2	2	1	2	0	0	0
133	2	1	0	0	67	0	67	2	2	1	1	1	1	0	2	1	0	0	1	2	2	2	1	1	0	0	0
134	2	2	1	1	10	1	6	2	2	1	2	4	2	2	2	1	0	0	3	1	2	1	2	1	1	1	0
135	1	2	0	0	73	0	73	2	2	1	1	2	2	0	1	2	0	0	3	2	2	1	2	1	0	0	0
136	1	2	0	0	70	0	70	2	2	1	2	1	1	0	2	1	0	0	1	2	1	2	2	1	0	0	0
137	1	2	0	1	9	1	8	2	2	1	1	3	2	2	1	2	0	0	3	1	2	2	2	1	0	0	0
138	2	1	0	0	72	0	72	2	2	1	2	2	2	0	1	2	0	0	3	2	2	2	1	1	0	0	0
139	1	2	1	1	11	1	9	2	2	1	2	4	2	0	1	2	0	0	3	2	1	2	1	1	0	0	1
140	1	2	0	0	64	0	64	2	2	1	1	1	1	0	2	1	0	0	2	2	1	3	2	1	1	1	0
141	1	1	0	0	67	0	67	2	2	1	1	2	2	0	2	2	0	0	3	2	2	2	1	1	1	2	1
142	1	1	0	1	24	1	10	2	2	1	2	3	1	2	2	1	0	1	3	2	2	1	2	1	1	2	0
143	2	1	0	0	67	0	67	2	2	1	2	1	1	0	2	1	1	1	3	2	2	2	2	1	0	0	0
144	2	2	0	0	79	0	79	2	2	1	1	3	2	2	1	2	0	0	3	2	2	1	1	1	0	0	0
145	1	2	0	0	58	0	58	2	2	1	1	1	1	0	1	1	0	0	2	2	1	2	2	1	0	0	1
146	2	1	1	1	14	1	11	2	2	1	2	4	2	2	1	1	0	0	3	1	2	1	2	1	0	0	0
147	2	1	0	1	44	1	16	1	1	1	2	2	2	0	1	1	0	0	3	2	1	2	2	2	0	0	1
148	1	2	0	0	74	0	74	1	1	1	1	1	1	0	2	2	0	1	2	2	2	2	2	2	0	0	0
149	1	2	0	0	58	0	58	1	1	1	1	2	2	0	2	1	0	0	3	2	1	2	2	2	0	0	1
150	1	1	1	0	75	0	75	2	2	1	2	4	2	1	2	1	1	1	3	2	2	3	2	1	0	0	1
151	1	2	1	1	21	1	17	1	1	1	1	4	2	1	2	2	0	1	3	2	1	3	2	2	0	0	1
152	2	1	0	0	72	0	72	1	1	1	1	3	1	1	2	1	0	0	3	2	1	1	2	2	0	0	1
153	1	2	0	1	74	1	65	1	1	2	1	3	2	1	2	1	0	0	3	2	1	2	2	2	0	0	1
154	2	1	0	0	71	0	71	1	1	2	1	1	1	0	2	2	0	0	1	2	2	2	2	2	0	0	0
155	1	2	0	0	79	0	79	1	1	2	1	1	1	0	2	2	0	0	3	2	2	3	2	2	0	0	0
156	1	2	0	0	63	0	63	2	1	1	1	1	1	0	2	2	0	0	1	2	2	2	2	1	0	0	0
157	1	1	1	1	23	1	18	1	2	1	2	4	2	1	2	1	0	0	3	2	1	2	2	2	1	2	1
158	2	1	0	1	21	1	14	1	2	1	1	3	2	2	2	2	0	0	2	1	2	3	2	2	0	0	1
159	2	2	0	0	60	0	60	2	1	1	2	2	2	0	2	2	0	0	1	2	1	3	2	2	0	0	1
160	1	2	0	0	74	0	74	2	1	1	1	1	1	0	1	2	0	0	3	2	1	3	2	2	0	0	0
161	2	1	0	1	15	1	15	1	2	1	2	3	2	2	2	2	0	0	3	1	2	2	1	2	0	0	0
162	2	1	0	1	33	1	28	2	1	2	1	2	2	0	1	1	0	0	3	2	1	2	2	2	0	0	1
163	1	2	0	0	61	0	61	2	2	1	2	3	2	1	1	2	1	0	3	2	1	1	1	1	0	0	0
164	1	1	0	0	67	1	59	1	2	1	1	3	2	1	2	2	0	0	3	2	1	2	1	2	0	0	1
165	1	2	0	0	70	0	70	1	2	1	2	2	2	0	1	2	0	1	1	2	2	2	1	2	0	0	1
166	1	2	0	0	75	0	75	2	2	1	1	2	2	0	1	2	0	0	1	2	1	1	2	1	0	0	1
167	1	2	0	1	27	1	15	2	2	1	1	3	2	1	1	2	0	0	1	2	1	2	1	1	0	0	1
168	2	1	1	1	35	1	28	2	2	1	2	4	2	2	2	2	1	1	3	2	1	2	2	1	1	2	0
169	2	2	0	0	79	0	79	2	2	1	1	3	2	2	2	2	0	1	3	1	2	2	1	1	0	0	0
170	1	1	0	0	61	0	61	2	2	1	1	3	2	2	2	1	0	0	3	1	2	1	1	1	0	0	1
171	2	1	0	0	79	0	79	2	2	1	1	2	2	0	1	2	0	0	3	2	2	1	1	1	0	0	1
172	1	2	0	0	60	0	60	2	1	1	1	1	1	0	1	1	0	0	1	2	1	1	2	1	0	0	0
173	2	2	0	0	60	0	60	2	2	1	1	1	1	0	1	2	0	0	3	2	2	2	1	1	0	0	0
174	2	2	0	0	74	0	74	1	1	2	1	1	1	0	2	1	0	0	1	2	1	2	2	2	0	0	0
175	1	1	0	0	69	0	69	1	1	1	2	1	1	0	2	1	0	0	3	2	2	2	1	2	0	0	0
176	2	1	0	0	60	0	60	1	1	1	2	3	2	1	1	1	0	0	3	2	2	1	2	2	0	0	1
177	2	1	0	0	63	0	63	1	1	2	1	2	2	0	1	1	0	0	3	2	1	2	2	2	0	0	1
178	2	2	0	0	76	0	76	1	1	1	1	2	2	0	1	1	0	0	3	2	1	3	2	2	0	0	0
179	1	2	0	1	26	1	22	1	1	1	2	2	2	0	1	1	1	0	3	2	1	2	2	2	1	1	0
180	2	2	0	0	74	0	74	1	1	2	1	3	1	1	2	1	0	0	3	2	1	3	2	2	1	2	1
181	1	2	0	0	68	0	68	1	1	2	1	2	2	0	2	2	0	0	3	1	1	2	2	2	0	0	0
182	1	1	0	0	74	0	74	1	1	2	1	1	1	0	2	1	0	0	1	2	1	2	2	2	1	3	0
183	1	2	1	1	21	1	16	1	1	2	2	4	2	0	2	1	0	0	3	2	2	2	2	2	0	0	0
184	2	2	0	0	75	0	75	1	1	2	1	1	1	0	1	1	0	0	1	2	2	1	2	2	0	0	0
185	2	2	0	0	61	0	61	1	1	1	1	1	1	0	2	2	0	0	1	2	1	2	2	2	0	0	0
186	1	2	0	0	70	0	70	1	1	1	1	3	2	2	2	2	1	1	1	2	2	2	1	2	0	0	0
187	2	2	0	0	65	0	65	1	1	2	2	2	2	0	2	2	0	0	3	2	1	3	2	2	0	0	1
188	1	1	0	1	12	1	10	1	1	2	1	3	2	1	1	2	0	1	3	2	2	2	2	2	0	0	1
189	1	2	0	1	64	1	64	1	1	1	2	1	1	0	1	2	0	0	3	2	1	2	1	1	0	0	0
190	1	1	0	0	67	0	67	1	1	2	1	1	1	0	1	1	0	0	3	2	1	2	2	2	0	0	0
191	1	1	0	0	61	0	61	1	1	2	2	3	2	2	2	2	1	0	3	1	1	2	2	2	0	0	1
192	2	1	0	0	60	0	60	1	1	2	1	1	1	0	2	2	0	0	3	2	1	2	2	2	0	0	0
193	1	1	0	0	69	0	69	2	1	1	1	2	2	0	2	2	0	0	3	2	2	2	2	2	0	0	1
194	1	2	0	1	28	1	16	1	1	2	2	3	2	1	2	1	0	1	3	2	2	2	2	2	0	0	1
195	2	1	0	0	62	0	62	1	1	2	1	3	1	2	1	1	0	0	3	2	2	3	2	2	0	0	0
196	2	1	0	0	78	0	78	2	1	1	1	1	1	0	1	1	0	0	1	2	1	2	2	2	1	1	0
197	1	2	0	1	28	1	23	1	1	1	2	2	2	0	2	2	0	0	3	2	2	1	1	2	1	2	0
198	2	2	0	1	12	1	11	1	1	1	1	3	2	1	1	1	1	0	2	1	2	2	1	2	1	1	0
199	1	2	0	0	64	0	64	1	1	1	1	1	1	0	2	1	0	0	3	2	1	3	2	2	0	0	0
200	1	1	0	0	80	0	80	1	1	2	1	3	2	1	2	1	0	0	3	2	1	2	2	2	0	0	1
201	1	2	0	1	43	1	30	1	1	1	1	1	1	0	1	2	0	1	2	2	1	2	1	2	0	0	1
202	2	1	0	0	66	0	66	1	1	1	1	3	2	1	2	1	0	0	2	1	1	2	1	2	0	0	1
203	2	1	0	1	43	1	17	1	1	1	2	2	2	0	2	1	0	0	1	2	1	2	1	2	0	0	1
204	1	1	0	1	43	1	35	1	1	1	2	2	2	0	1	1	0	0	2	2	2	2	2	2	0	0	1
205	1	1	1	0	74	1	41	1	1	1	1	3	2	1	1	2	0	0	3	1	2	2	1	2	1	2	0
206	1	2	0	1	11	1	11	1	1	1	2	2	2	0	2	1	0	1	1	2	2	2	1	1	0	0	1
207	1	1	0	0	76	0	76	2	1	1	1	3	2	2	2	1	0	0	3	1	2	3	2	2	0	0	0
208	2	1	0	0	73	0	73	1	1	1	1	2	2	0	1	2	0	0	3	2	1	2	2	2	1	1	1
209	1	1	0	1	27	1	14	1	1	1	1	3	2	1	2	1	1	1	3	2	1	1	1	1	0	0	0
210	2	1	0	0	79	0	79	1	1	2	1	1	1	0	2	1	0	0	3	2	1	2	2	2	0	0	0
211	1	2	0	0	71	0	71	1	1	2	2	3	2	1	1	1	0	0	3	2	1	1	2	2	0	0	1
212	1	2	0	0	77	0	77	1	1	1	2	3	2	2	1	1	0	0	1	2	2	2	2	2	0	0	1
213	2	1	0	0	80	0	80	1	1	1	1	2	2	0	2	1	0	1	3	1	1	2	2	2	0	0	1
214	2	2	0	0	75	0	75	1	1	1	1	3	1	2	2	1	0	0	2	2	1	3	2	2	0	0	0
215	1	1	0	0	77	0	77	1	1	1	1	2	2	0	1	2	0	0	3	2	2	2	2	2	0	0	0
216	1	1	0	0	69	0	69	2	1	1	2	3	2	1	1	1	0	0	3	2	1	2	1	1	0	0	0
217	2	1	0	0	65	1	65	1	2	1	1	3	2	2	2	1	0	0	3	2	1	2	2	2	0	0	1
218	1	2	0	1	28	1	22	1	1	1	1	2	2	0	2	1	0	0	3	2	1	2	2	2	0	0	1
219	1	2	0	0	64	0	64	1	1	2	2	1	1	0	2	1	0	0	3	2	1	2	2	2	0	0	0
220	1	1	0	0	71	0	71	1	1	1	1	1	1	0	2	1	0	0	3	1	1	3	2	2	0	0	1
221	1	2	0	0	79	0	79	1	1	1	1	1	1	0	2	2	0	0	3	2	1	2	1	2	0	0	0
222	1	2	0	0	66	0	66	1	1	2	1	2	2	0	2	1	1	1	3	2	2	3	2	2	1	2	0
223	1	1	0	0	68	0	68	1	1	1	1	3	2	2	1	1	0	0	1	2	1	2	2	2	0	0	0
224	2	2	0	1	16	1	12	1	1	1	2	3	1	1	1	2	0	0	3	2	1	2	1	2	0	0	0
225	1	1	0	0	75	0	75	1	1	2	2	3	2	1	2	1	0	0	3	2	1	2	2	2	0	0	1
226	1	1	0	0	74	0	74	1	1	2	1	3	2	1	1	1	1	0	3	2	1	1	2	2	0	0	1
227	2	1	0	0	79	0	79	1	1	2	1	2	2	0	2	1	0	0	3	2	1	2	2	2	0	0	1
228	1	1	0	0	74	0	74	1	1	2	2	2	2	0	1	1	0	0	2	2	2	3	2	2	1	2	1
229	1	1	0	1	51	1	51	1	1	1	1	3	2	2	2	1	0	1	2	1	2	2	2	2	0	0	1
230	2	2	0	0	76	0	76	1	2	1	1	2	2	0	2	2	0	0	3	2	2	2	2	2	1	2	0
231	1	1	0	0	70	0	70	1	1	2	1	2	2	0	2	2	0	0	3	2	2	3	2	2	0	0	0
232	1	2	0	0	74	0	74	1	1	2	1	2	2	0	2	1	0	0	3	2	1	2	2	2	0	0	1
233	1	1	0	1	30	1	28	1	1	1	2	3	2	2	2	1	0	0	3	2	2	3	2	2	0	0	1
234	1	1	0	0	79	0	79	1	1	2	1	2	2	0	2	2	0	0	3	2	2	2	2	2	0	0	1
235	2	2	0	0	72	0	72	1	1	2	1	3	1	1	2	1	0	1	3	2	1	2	2	2	0	0	1
236	1	2	0	0	68	0	68	2	1	1	1	1	1	0	2	1	0	0	1	2	1	2	2	2	0	0	0
237	1	1	0	1	38	1	35	1	1	2	1	3	2	1	1	2	0	1	3	2	2	3	2	2	0	0	1
238	2	1	0	0	73	0	73	1	1	2	1	3	1	2	2	2	0	0	3	2	1	3	2	2	0	0	0
239	1	1	0	1	62	1	62	1	1	2	2	2	2	0	2	2	0	0	3	2	2	2	2	2	0	0	0
240	2	1	0	0	77	0	77	1	2	1	1	1	1	0	1	1	0	0	3	2	2	2	2	2	0	0	0
241	2	1	0	0	72	0	72	1	1	1	2	3	2	2	2	1	1	1	1	2	2	2	2	2	0	0	1
242	1	2	0	0	59	0	59	1	1	2	1	3	2	1	2	2	0	0	1	2	1	3	2	2	0	0	1
243	2	1	0	0	72	0	72	1	1	1	1	1	1	0	1	1	0	0	3	2	1	2	2	2	0	0	0
244	1	2	0	0	74	1	35	1	1	1	2	1	1	0	2	2	0	1	1	2	1	3	2	2	0	0	0
245	2	1	0	1	9	1	8	1	2	1	2	3	2	2	1	1	0	0	3	2	1	2	2	2	0	0	0
246	2	1	0	0	65	0	65	2	1	1	1	2	2	0	2	1	0	0	2	2	1	1	2	2	0	0	0
247	1	1	0	0	72	0	72	1	1	1	2	3	2	1	1	1	0	0	3	2	2	2	2	2	1	2	0
248	2	1	0	0	64	0	64	1	1	1	1	2	2	0	1	2	0	0	3	2	1	2	1	2	0	0	0
249	1	1	0	0	71	0	71	1	1	1	2	3	2	2	2	1	0	0	3	2	1	3	1	2	0	0	0
250	2	2	0	1	25	1	4	1	1	1	2	3	2	2	1	2	0	0	3	2	1	2	2	2	0	0	0
251	1	1	0	0	59	0	59	1	1	2	1	2	2	0	1	1	1	0	3	2	1	3	2	2	1	2	1
252	2	2	0	0	77	0	77	1	1	1	1	3	1	1	1	1	0	0	2	2	1	2	2	2	0	0	0
253	2	1	0	0	72	0	72	1	2	1	1	3	2	1	2	2	1	1	3	2	2	2	2	2	0	0	1
254	1	2	0	0	62	0	62	1	1	1	2	2	2	0	1	1	0	0	3	2	2	1	2	2	0	0	0
255	2	2	0	1	24	1	24	1	1	1	1	2	2	0	1	1	0	0	3	2	1	2	2	2	1	1	0
256	2	1	0	0	61	0	61	2	1	1	2	2	2	0	1	1	0	0	2	2	1	2	2	2	0	0	1
257	1	2	0	0	74	0	74	1	1	2	1	3	2	1	2	1	0	0	3	2	2	2	2	2	0	0	1
258	1	1	0	0	60	0	60	2	1	1	1	3	1	1	2	2	0	0	3	2	2	3	2	2	0	0	1
259	2	2	0	0	80	0	80	1	2	1	1	1	1	0	1	1	0	0	1	2	1	1	2	2	0	0	0
260	1	1	0	0	68	1	40	2	2	1	2	3	2	2	1	1	1	0	3	2	1	2	2	2	0	0	1
261	2	1	1	0	73	1	73	2	1	1	2	4	1	0	1	1	0	1	2	2	2	2	2	2	0	0	0
262	1	1	0	1	28	1	9	1	1	2	1	3	2	2	2	2	0	0	3	2	1	3	2	2	0	0	0
263	1	1	0	0	60	1	60	2	1	2	1	3	2	1	2	1	1	1	3	1	1	2	2	2	0	0	1
264	1	1	1	1	18	1	15	1	1	2	1	4	2	0	1	2	0	0	3	2	2	1	2	2	0	0	1
265	1	2	0	0	74	0	74	1	1	1	1	2	2	0	1	2	0	0	3	2	1	1	1	1	1	1	0
266	2	2	0	0	73	0	73	1	1	2	2	2	2	0	2	1	0	0	3	2	2	3	2	2	0	0	1
267	1	1	0	1	6	1	4	2	1	2	2	3	2	2	2	2	0	1	3	1	1	2	2	2	1	1	1
268	1	1	0	0	61	0	61	1	1	2	1	2	2	0	2	2	0	0	2	2	2	2	2	2	0	0	1
269	2	1	0	0	68	0	68	2	1	2	1	1	1	0	2	1	0	0	3	2	1	2	2	2	0	0	1
270	1	1	0	0	67	0	67	1	2	1	1	3	2	1	1	1	0	0	1	2	2	1	2	2	0	0	1
271	1	2	0	1	27	1	20	1	1	1	1	3	2	1	1	1	0	0	3	2	2	2	2	2	0	0	1
272	2	1	0	0	67	0	67	2	1	1	1	2	2	0	2	2	0	0	3	2	1	3	2	2	0	0	1
273	1	2	0	0	79	0	79	2	2	1	1	2	2	0	1	2	0	0	3	2	1	1	2	1	0	0	0
274	2	1	0	0	79	0	79	1	1	1	1	3	2	1	1	2	0	0	3	2	1	2	1	2	0	0	1
275	1	1	0	1	27	1	10	2	1	1	2	3	2	2	1	1	0	0	3	2	1	2	1	1	0	0	0
276	1	2	0	1	39	1	39	2	1	1	2	3	2	2	1	2	0	0	3	2	2	3	2	2	0	0	0
277	1	2	0	0	70	0	70	2	1	1	1	3	1	1	2	1	0	0	1	2	1	2	2	1	0	0	0
278	1	1	0	0	74	0	74	1	1	2	2	3	2	1	1	1	0	0	3	1	1	2	2	2	0	0	1
279	2	2	0	0	64	0	64	1	1	1	2	3	2	1	2	1	0	0	3	2	2	2	1	2	0	0	1
280	2	2	0	1	52	1	52	2	2	1	2	3	2	2	2	1	1	1	3	2	2	3	2	2	0	0	1
281	2	1	0	1	18	1	17	2	1	1	1	3	2	1	1	2	0	0	3	2	2	2	2	2	0	0	1
282	1	1	0	0	72	0	72	2	1	1	2	3	2	1	1	1	0	1	1	2	2	2	1	1	0	0	1
283	1	1	0	0	68	0	68	1	2	1	1	2	2	0	1	2	0	0	3	1	2	2	2	2	0	0	1
284	2	2	0	0	78	0	78	2	2	1	1	1	1	0	1	1	0	0	1	2	1	2	1	2	0	0	0
285	1	1	0	0	70	0	70	1	2	1	1	3	2	1	1	1	0	0	3	2	2	3	2	2	0	0	0
286	1	1	0	0	74	0	74	2	1	1	1	3	2	1	1	1	0	0	3	2	1	2	2	2	0	0	1
287	1	2	0	1	10	1	10	2	2	1	2	3	2	1	1	2	1	1	3	2	2	2	1	1	1	2	0
288	2	1	0	0	70	0	70	2	1	2	1	2	2	0	1	1	1	1	1	1	1	2	2	2	0	0	1
289	1	2	0	0	79	0	79	2	1	1	1	2	2	0	1	1	0	0	3	2	2	3	1	1	0	0	1
290	1	2	0	1	20	1	18	2	2	1	2	3	2	1	2	1	0	0	3	2	1	1	1	1	0	0	1
291	1	2	0	0	62	0	62	2	2	1	1	2	2	0	1	1	0	0	3	2	2	1	1	1	0	0	1
292	2	1	0	0	71	0	71	1	2	1	1	2	2	0	1	2	0	0	3	2	2	1	2	2	0	0	1
293	2	2	0	0	72	0	72	1	2	1	2	2	2	0	1	2	0	0	3	2	1	3	2	2	0	0	0
294	2	1	1	1	26	1	20	2	1	2	2	4	2	1	1	1	0	0	3	2	1	1	2	1	0	0	0
295	2	2	0	0	69	0	69	1	1	2	1	2	2	0	1	2	0	0	3	2	1	3	2	2	1	1	1
296	2	1	0	1	25	1	19	2	2	1	1	3	2	2	1	1	0	0	3	1	1	2	2	1	0	0	0
297	1	2	0	1	60	1	60	2	2	1	1	1	1	0	2	1	0	0	3	2	1	2	2	1	1	2	0
298	1	2	0	0	63	0	63	2	2	2	1	1	1	0	1	2	0	0	1	2	1	3	2	2	1	1	0
299	1	1	0	0	75	0	75	2	2	2	1	1	1	0	2	1	0	0	3	2	1	2	2	2	0	0	0
300	2	2	0	0	70	0	70	2	1	2	1	3	2	1	1	2	0	0	3	2	1	3	2	2	0	0	1
301	1	2	0	1	50	1	42	2	2	1	1	1	1	0	2	1	0	0	2	2	1	2	2	1	0	0	0
302	1	2	0	0	66	0	66	1	1	1	2	2	2	0	2	2	0	0	3	2	2	2	1	1	1	2	1
303	2	1	0	0	76	0	76	1	2	1	1	3	2	1	1	2	0	0	1	1	2	2	2	2	0	0	0
304	1	1	0	0	75	0	75	2	2	1	1	1	1	0	2	1	0	0	1	2	1	2	2	2	0	0	0
305	1	1	0	0	79	0	79	2	1	1	1	2	2	0	1	2	0	0	3	2	2	2	2	1	0	0	1
306	1	1	1	1	10	1	7	2	2	1	2	4	2	2	2	2	0	0	3	1	2	2	1	1	0	0	0
307	1	2	0	0	61	0	61	2	1	2	2	3	2	1	1	1	0	0	3	2	1	1	2	1	0	0	0
308	1	2	0	0	68	0	68	2	2	1	2	2	2	0	1	2	0	0	3	2	2	2	2	1	0	0	0
309	1	2	0	1	21	1	15	2	2	1	2	2	2	0	2	1	0	0	3	2	2	1	2	1	0	0	0
310	1	2	0	0	65	0	65	2	2	1	1	1	1	0	2	2	0	0	1	2	2	3	1	2	0	0	0
311	2	1	0	0	64	0	64	2	1	1	1	3	2	1	2	1	0	0	1	2	2	2	2	2	0	0	1
312	2	2	1	1	48	1	40	1	2	1	2	4	2	2	1	1	0	1	2	2	2	2	2	2	0	0	1
313	1	1	1	1	14	1	14	2	2	1	2	4	2	0	1	2	0	0	3	2	2	2	1	1	0	0	0
314	1	1	1	0	78	1	75	2	1	1	2	4	2	1	1	2	0	0	3	2	1	3	1	1	0	0	1
315	1	2	0	1	39	1	27	2	2	1	2	3	1	1	2	2	0	0	1	2	1	2	2	1	0	0	1
316	2	2	0	0	66	0	66	2	2	1	1	3	2	1	2	1	0	0	1	2	1	2	2	2	0	0	1
317	1	1	0	0	71	0	71	2	2	1	1	2	2	0	2	2	0	0	1	2	2	2	1	1	0	0	0
318	2	2	0	1	21	1	21	2	1	1	2	3	2	1	1	2	0	0	3	2	2	2	2	1	1	1	0
319	1	2	0	0	74	0	74	2	2	1	2	2	2	0	1	1	0	0	3	2	1	2	2	1	0	0	1
320	1	2	0	1	60	1	43	2	2	1	2	3	2	1	1	2	0	1	2	2	1	2	2	1	0	0	1
321	2	2	0	0	74	1	74	2	1	2	2	2	2	0	1	2	1	1	3	1	2	2	2	2	1	1	0
322	1	1	0	0	77	0	77	2	1	1	1	3	1	1	2	1	0	1	1	1	1	3	1	1	1	2	1
323	1	1	0	0	76	0	76	2	2	1	1	2	2	0	2	2	0	0	3	2	2	2	1	1	1	1	1
324	1	1	0	1	36	1	36	2	1	2	2	2	2	0	2	1	0	0	3	1	2	3	2	1	1	2	1
325	1	1	0	0	63	0	63	2	2	1	2	1	1	0	2	1	0	0	3	2	2	2	1	1	0	0	0
326	2	1	0	0	69	0	69	2	1	1	2	2	2	0	2	2	0	0	1	2	2	1	1	1	0	0	1
327	1	1	0	0	76	0	76	2	2	1	1	1	1	0	1	2	0	0	1	2	2	2	2	1	0	0	0
328	2	1	0	0	77	0	77	2	2	2	1	3	2	1	1	1	0	0	3	2	2	3	2	2	0	0	1
329	2	2	0	0	73	0	73	2	2	1	2	2	2	0	2	2	0	0	3	2	1	2	2	1	0	0	1
330	1	2	0	0	77	0	77	2	2	1	1	2	2	0	1	2	0	0	3	2	2	2	2	1	0	0	1
331	2	1	0	0	66	0	66	2	2	1	2	1	1	0	1	1	0	0	3	2	1	2	2	1	0	0	0
332	2	1	0	0	62	0	62	2	2	1	2	1	1	0	1	2	0	0	1	2	2	2	2	2	0	0	0
333	1	2	1	1	11	1	8	2	2	1	2	4	2	2	2	1	0	0	3	2	1	2	1	1	0	0	0
334	1	2	0	1	22	1	18	2	2	1	1	3	1	1	1	2	0	0	1	2	2	2	2	1	0	0	0
335	1	1	0	1	23	1	18	2	2	1	1	3	2	2	1	2	0	0	3	2	2	2	1	1	0	0	1
336	1	2	0	1	33	1	31	2	2	1	1	3	2	2	1	2	0	1	3	2	2	2	1	1	1	2	0
337	2	1	0	0	63	1	63	2	2	1	2	3	1	0	1	1	0	0	1	2	1	2	1	1	1	2	1
338	2	1	0	1	20	1	4	2	2	1	1	3	2	2	1	1	0	1	3	2	2	2	2	1	1	1	0
339	2	1	1	1	3	1	3	2	2	1	2	4	2	2	2	2	0	1	3	2	1	2	1	1	1	1	1
340	2	2	1	1	44	1	36	2	2	1	2	4	2	1	1	2	1	1	3	2	1	1	1	1	0	0	0
341	1	2	0	0	76	0	76	2	2	1	2	2	2	0	1	2	0	0	1	2	2	2	1	1	0	0	0
342	1	2	0	0	68	0	68	2	2	1	1	3	2	2	1	1	0	0	1	2	1	1	2	1	0	0	0
343	1	2	0	0	70	0	70	2	2	1	1	3	2	1	1	2	0	0	3	1	2	2	1	1	0	0	0
344	1	2	0	0	66	0	66	2	2	1	2	1	1	0	2	2	0	0	3	2	2	3	2	1	0	0	0
345	1	2	0	1	12	1	12	2	2	1	1	2	2	0	1	2	0	1	2	1	2	2	1	1	1	1	1
346	1	1	0	0	74	0	74	2	2	1	2	2	2	0	1	2	0	0	3	2	1	2	2	1	0	0	1
347	2	2	0	0	71	0	71	1	1	1	2	3	2	1	2	1	0	0	3	2	2	2	1	2	0	0	1
348	1	2	0	0	60	0	60	2	2	1	2	2	2	0	1	1	0	0	3	2	1	1	1	1	1	1	0
349	2	1	0	0	68	0	68	1	1	2	1	2	2	0	1	2	0	0	3	2	1	2	2	2	0	0	1
350	1	1	0	1	28	1	16	1	1	2	2	3	2	1	2	2	0	1	3	2	1	3	2	2	0	0	1
351	1	1	0	0	69	0	69	2	1	2	1	3	2	1	2	2	0	1	3	2	1	2	2	2	0	0	1
352	1	2	0	1	13	1	2	1	1	2	2	3	2	2	2	2	0	0	3	1	1	3	2	2	0	0	0
353	1	1	0	0	73	1	46	1	1	1	1	3	1	1	2	1	0	0	1	2	1	2	2	2	0	0	0
354	2	1	0	0	64	1	61	1	1	2	1	1	1	0	1	1	0	0	3	2	1	2	2	2	0	0	0
355	1	2	0	1	72	1	49	1	1	1	2	3	2	0	1	1	0	0	1	2	1	1	1	2	0	0	1
356	2	1	0	0	65	0	65	1	1	1	1	3	2	2	2	1	0	0	3	2	1	2	2	2	0	0	1
357	2	1	0	0	68	0	68	1	1	2	1	2	2	0	2	1	0	0	3	2	1	2	2	2	1	3	1
358	1	1	0	0	70	0	70	1	1	2	1	3	2	1	2	1	0	0	3	2	1	2	2	2	0	0	1
359	2	1	0	0	71	0	71	1	1	2	1	1	1	0	1	2	0	1	1	2	1	2	2	2	1	2	0
360	1	2	0	1	53	1	12	1	1	2	2	3	2	1	2	1	0	0	3	2	1	2	2	2	1	1	0
361	1	2	0	1	32	1	32	1	1	1	2	3	2	1	2	1	1	0	3	2	2	3	1	2	0	0	1
362	1	2	0	0	80	0	80	1	1	1	1	3	2	2	1	1	0	1	3	2	1	2	2	2	0	0	0
363	2	2	0	0	73	0	73	1	1	2	1	2	2	0	2	1	0	0	3	2	2	2	2	2	1	2	1
364	1	1	0	0	60	0	60	1	1	2	1	2	2	0	2	2	0	0	3	2	1	3	2	2	0	0	1
365	1	2	0	0	66	0	66	1	1	2	2	2	2	0	2	2	0	0	3	2	2	2	2	2	0	0	0
366	2	1	0	0	74	0	74	2	1	2	1	3	2	1	2	1	0	0	3	2	2	2	2	2	0	0	1
367	1	1	0	0	68	0	68	2	1	1	1	1	1	0	1	2	0	0	1	2	2	2	2	2	0	0	0
368	2	2	0	0	64	0	64	1	2	1	2	3	2	1	1	2	0	0	1	2	2	3	2	2	0	0	1
369	1	1	0	1	29	1	29	1	1	1	1	3	2	1	1	2	0	0	2	2	2	3	2	2	0	0	1
370	1	1	0	1	20	1	15	1	1	1	1	3	2	1	1	2	0	0	3	1	1	2	2	2	1	2	1
371	2	1	0	0	68	0	68	2	1	1	1	2	2	0	1	2	0	0	1	2	1	3	2	2	0	0	1
372	2	2	0	1	19	1	17	2	2	1	2	2	2	0	2	2	0	0	3	2	2	2	2	2	0	0	0
373	2	2	0	1	64	1	40	1	1	1	1	2	2	0	1	2	0	0	3	2	2	2	1	2	0	0	0
374	1	1	0	0	72	0	72	1	1	2	1	3	1	1	2	2	0	0	3	2	2	2	2	2	0	0	0
375	1	2	0	1	31	1	17	1	1	1	1	2	2	0	2	1	0	0	3	2	2	2	1	2	0	0	1
376	1	2	0	0	72	0	72	1	1	1	2	3	2	1	2	1	0	1	3	2	2	2	1	2	0	0	0
377	2	1	0	0	63	0	63	2	2	1	1	2	2	0	1	2	0	0	3	2	1	2	2	2	0	0	1
378	2	2	0	0	58	0	58	2	2	1	1	2	1	0	2	1	0	0	2	2	2	2	2	2	0	0	1
379	1	1	0	0	74	0	74	2	2	2	1	2	2	0	2	1	0	0	3	2	2	2	2	2	0	0	0
380	2	1	0	0	66	0	66	1	2	1	1	1	1	0	2	1	0	0	3	2	2	2	1	2	0	0	0
381	1	2	0	0	70	0	70	2	1	1	1	1	1	0	1	1	0	0	3	2	2	1	2	1	0	0	0
382	2	2	1	1	19	1	15	2	2	1	2	4	2	0	1	2	0	0	3	2	2	2	1	2	0	0	0
383	2	2	0	0	72	0	72	2	2	1	2	1	1	0	1	2	0	0	1	2	2	1	2	1	0	0	0
384	1	1	0	0	73	0	73	1	2	1	2	3	2	1	1	2	0	1	3	2	2	2	2	2	0	0	1
385	1	2	0	1	47	1	36	2	1	2	1	3	2	2	2	1	0	0	3	2	1	2	2	1	0	0	0
386	1	1	0	0	72	0	72	1	1	2	1	1	1	0	1	2	0	0	3	2	2	1	2	2	0	0	1
387	1	2	0	0	78	0	78	2	2	1	2	2	2	0	1	2	0	0	2	2	2	1	1	1	1	1	0
388	2	2	1	1	3	1	3	2	1	1	2	4	2	1	1	2	0	0	3	1	2	2	1	1	1	1	1
389	1	1	0	0	73	0	73	2	1	2	1	1	1	0	1	1	0	0	3	2	1	2	2	1	0	0	1
390	1	1	1	0	63	0	63	2	1	2	1	4	2	0	1	2	0	0	3	1	2	2	2	1	0	0	0
391	1	1	1	1	13	1	8	2	2	1	2	4	2	1	1	2	0	0	3	1	2	2	2	1	0	0	1
392	2	1	0	1	28	1	20	2	1	1	2	2	2	0	1	1	0	0	1	2	2	2	1	1	0	0	1
393	2	1	0	0	62	0	62	2	2	1	2	1	1	0	2	1	0	0	1	2	1	2	2	1	0	0	1
394	1	1	0	0	64	0	64	2	2	1	1	2	2	0	1	2	0	0	3	2	1	2	2	1	0	0	0
395	1	1	0	0	68	0	68	2	2	1	1	1	1	0	2	1	0	0	1	2	2	2	1	1	0	0	0
396	1	1	0	0	72	0	72	2	2	1	1	1	1	0	2	1	0	0	1	2	2	1	2	1	0	0	0
397	1	1	1	1	18	1	18	2	2	1	1	4	2	1	1	2	1	1	3	1	2	2	2	1	0	0	1
398	1	2	0	1	43	1	43	2	2	1	2	3	2	1	1	2	0	0	3	1	2	2	1	1	1	3	0
399	1	2	0	0	73	0	73	1	1	1	1	2	2	0	2	1	0	0	3	2	1	3	2	2	0	0	1
400	1	2	0	1	11	1	6	2	2	1	2	2	2	0	2	2	0	0	3	2	1	3	2	1	1	2	0
401	2	2	0	0	78	0	78	1	1	1	1	1	1	0	1	2	0	0	3	2	1	2	1	2	0	0	0
402	2	2	0	0	60	0	60	1	1	2	1	1	1	0	2	1	0	0	1	2	1	2	2	2	0	0	0
403	1	1	1	1	30	1	25	1	1	1	2	4	2	1	1	2	0	0	3	2	1	2	2	2	0	0	1
404	1	2	0	0	71	0	71	1	1	1	1	1	1	0	1	2	1	1	3	2	2	3	1	2	0	0	0
405	2	1	0	0	69	0	69	1	1	2	1	2	2	0	1	1	0	0	3	2	1	3	2	2	1	1	1
406	2	2	0	0	80	0	80	1	1	2	1	1	1	0	1	2	0	0	1	2	1	1	2	2	0	0	0
407	2	1	0	0	70	0	70	1	1	2	1	3	1	1	2	1	1	1	1	2	1	3	2	2	0	0	0
408	1	2	0	0	77	0	77	1	1	1	2	1	1	0	2	1	0	0	3	2	1	2	1	2	0	0	0
409	1	2	0	1	25	1	23	1	1	1	1	2	2	0	2	2	0	0	1	2	2	2	2	2	0	0	0
410	1	2	0	0	79	0	79	1	1	2	1	1	1	0	1	2	0	0	3	2	1	3	2	2	0	0	0
411	2	2	0	1	6	1	6	1	1	1	1	2	2	0	2	1	0	0	2	2	1	3	2	2	0	0	0
412	2	1	0	0	60	1	60	1	1	2	1	2	2	0	2	1	0	0	3	2	2	2	2	2	1	1	0
413	1	1	0	0	76	0	76	1	1	1	1	3	2	1	1	2	0	0	3	2	2	3	1	1	0	0	1
414	2	2	0	1	36	1	9	1	2	1	1	3	2	2	1	2	0	0	3	2	1	2	2	2	1	1	1
415	1	1	0	0	58	0	58	1	1	1	1	2	2	0	1	1	0	0	3	1	1	1	2	1	0	0	0
416	1	1	0	0	74	0	74	1	1	2	2	1	1	0	2	1	0	0	3	2	1	2	2	2	0	0	0
417	2	1	0	1	28	1	23	1	1	2	1	1	1	0	1	1	0	0	3	2	1	2	2	2	0	0	0
418	2	2	0	0	65	0	65	1	1	2	2	3	2	2	1	1	0	0	3	2	1	3	2	2	0	0	0
419	2	1	0	1	20	1	15	1	1	2	1	3	2	1	2	1	0	0	2	2	1	3	2	2	0	0	1
420	2	2	0	0	61	0	61	1	1	2	2	2	2	0	2	1	0	0	3	2	1	2	2	2	1	1	1
421	1	2	0	0	77	0	77	1	1	1	2	3	2	1	2	2	0	0	3	2	2	3	2	2	0	0	1
422	2	2	0	0	80	0	80	1	1	1	1	2	1	0	1	2	0	1	1	2	1	2	2	2	0	0	0
423	1	1	0	1	27	1	22	1	2	1	1	3	2	2	2	2	1	1	3	1	2	2	1	2	1	1	0
424	1	1	0	0	78	0	78	1	1	1	1	2	2	0	1	2	0	0	3	2	2	3	2	2	0	0	1
425	2	1	0	0	68	0	68	1	1	2	1	2	2	0	2	2	0	0	3	2	2	2	2	2	0	0	1
426	1	2	0	0	70	0	70	1	1	2	2	3	1	1	1	2	0	0	2	2	2	3	2	2	1	4	1
427	1	2	0	1	7	1	7	2	1	1	2	2	2	0	1	1	0	0	1	2	1	2	2	1	0	0	1
428	2	1	1	1	24	1	18	1	1	1	1	4	2	2	1	1	0	0	3	1	2	2	2	2	0	0	0
429	2	1	0	0	70	0	70	1	1	2	1	2	2	0	1	2	0	0	1	2	2	2	2	2	0	0	1
430	2	1	0	0	63	0	63	2	1	1	2	2	2	0	2	1	0	0	2	2	1	3	2	2	0	0	1
431	1	1	0	1	8	1	8	2	1	2	2	3	2	2	2	1	0	0	3	2	1	3	2	2	0	0	1
432	1	2	0	1	36	1	36	1	1	2	1	1	1	0	1	2	0	0	2	2	1	1	2	2	0	0	0
433	2	1	0	0	62	0	62	1	2	1	1	3	2	1	1	1	0	1	3	1	2	2	2	2	0	0	1
434	2	1	0	0	73	0	73	2	1	1	1	2	2	0	2	1	0	0	3	2	1	1	1	2	0	0	1
435	1	2	0	0	79	0	79	2	1	1	1	3	1	1	2	2	0	0	3	2	1	1	2	1	0	0	1
436	1	1	1	1	21	1	15	1	1	2	2	4	2	2	1	1	1	0	3	2	2	3	2	2	0	0	1
437	2	2	0	0	71	0	71	2	1	1	1	1	1	0	1	2	0	0	2	2	1	2	2	2	0	0	0
438	1	2	0	0	80	0	80	2	1	1	2	2	2	0	2	2	0	0	3	2	2	2	2	2	0	0	1
439	1	2	0	0	69	0	69	2	1	1	1	2	2	0	2	1	0	0	3	2	2	3	2	2	0	0	0
440	1	1	0	0	80	0	80	1	2	2	1	3	2	1	1	2	0	1	3	2	2	2	2	2	0	0	1
441	1	2	0	0	76	0	76	2	1	1	1	2	2	0	1	1	0	0	3	2	2	3	2	1	1	1	1
442	1	1	0	0	79	0	79	2	1	1	2	2	2	0	1	2	0	0	3	2	2	3	1	2	0	0	0
443	2	2	0	0	66	0	66	1	1	1	1	3	1	1	2	1	0	0	3	2	2	2	2	2	0	0	1
444	2	2	0	0	71	0	71	2	1	1	1	1	1	0	1	2	1	1	2	1	2	3	1	2	0	0	1
445	2	2	0	0	66	0	66	2	1	1	2	2	2	0	2	2	1	0	3	2	2	2	1	2	0	0	0
446	2	1	0	0	77	0	77	1	1	2	1	3	2	1	1	1	0	0	3	2	1	3	2	2	0	0	1
447	1	1	0	1	51	1	30	1	1	2	1	2	2	0	1	2	1	0	3	2	2	2	2	2	0	0	1
448	1	2	0	0	78	0	78	1	2	1	1	2	2	0	2	2	0	0	3	2	2	2	2	2	0	0	0
449	1	2	0	0	71	0	71	2	2	1	1	1	1	0	1	2	0	0	1	2	2	1	1	1	1	2	0
450	2	2	0	1	33	1	15	2	2	1	2	3	2	1	1	2	0	1	3	2	1	2	1	1	1	2	1
451	1	2	0	1	27	1	20	2	1	1	2	2	2	0	1	1	0	0	1	2	1	3	2	1	0	0	1
452	1	1	0	0	79	0	79	2	2	1	1	3	2	1	1	2	0	0	3	2	2	2	2	1	0	0	1
453	2	1	0	1	15	1	15	2	1	1	1	2	2	0	2	1	0	0	3	2	2	1	2	2	0	0	1
454	2	1	1	1	15	1	6	2	1	1	2	4	2	0	1	2	0	0	3	2	1	1	2	1	1	2	1
455	1	2	0	0	72	1	72	2	1	1	2	2	2	0	1	2	0	0	3	2	2	2	1	1	1	2	0
456	1	1	0	1	17	1	12	1	1	2	1	1	1	0	2	1	0	0	3	2	2	3	2	2	1	1	1
457	2	2	0	0	68	0	68	2	2	1	2	3	1	1	2	1	0	0	3	2	2	2	2	1	1	1	0
458	2	1	1	1	13	1	10	2	2	1	1	4	2	0	1	1	0	0	3	2	2	2	1	2	0	0	1
459	2	2	0	1	44	1	44	2	1	1	1	2	2	0	2	1	0	0	3	2	1	3	2	2	0	0	0
460	2	1	0	0	78	0	78	1	2	1	1	3	2	1	1	2	0	0	3	2	1	3	2	2	0	0	1
461	2	1	0	0	70	0	70	2	1	2	2	3	1	1	1	1	0	0	3	2	1	2	2	2	1	1	0
462	1	1	0	1	36	1	8	1	1	2	1	3	2	2	2	1	0	1	3	1	2	1	2	2	0	0	1
463	1	2	0	1	38	1	38	2	1	1	2	2	2	0	1	1	0	0	3	2	1	2	1	1	1	2	0
464	1	2	0	1	31	1	11	2	1	2	2	3	2	2	1	1	0	0	3	2	1	3	2	2	0	0	1
465	1	2	0	1	48	1	40	2	2	1	1	1	1	0	1	1	0	0	3	2	2	2	1	1	0	0	0
466	1	2	0	1	36	1	28	2	1	2	2	3	2	2	1	1	0	1	2	2	2	2	2	2	0	0	1
467	1	1	0	0	64	0	64	1	1	2	1	2	2	0	1	2	0	0	3	2	2	2	2	2	0	0	1
468	1	2	0	1	15	1	10	2	1	1	2	3	2	2	2	1	1	1	3	1	2	3	2	1	0	0	0
469	2	2	0	0	73	0	73	2	1	1	1	2	2	0	2	2	1	1	3	2	1	3	2	2	0	0	0
470	1	1	1	1	19	1	8	2	2	1	2	4	2	1	1	2	0	1	1	2	2	2	1	2	0	0	1
471	1	1	0	0	74	0	74	2	2	1	1	3	2	1	2	1	0	0	3	2	1	2	2	1	0	0	1
472	2	2	0	1	33	1	25	2	2	1	1	3	2	1	1	2	0	0	3	2	2	1	1	1	0	0	1
473	1	1	0	0	77	0	77	2	1	1	2	2	2	0	1	2	0	0	2	2	2	2	1	1	1	1	0
474	1	1	0	0	68	0	68	2	2	1	1	1	1	0	1	2	0	0	1	2	2	3	1	2	0	0	0
475	1	1	0	1	24	1	19	2	2	1	2	3	2	1	1	2	0	0	3	2	2	2	2	1	0	0	0
476	1	2	0	1	36	1	36	2	2	1	2	1	1	0	1	1	0	0	2	2	2	3	2	1	0	0	0
477	2	1	0	1	60	1	48	2	2	1	1	3	1	2	1	1	0	0	3	2	1	1	2	1	0	0	1
478	1	1	0	0	62	0	62	2	1	1	2	2	2	0	2	2	0	0	3	2	2	2	2	1	0	0	1
479	1	2	0	0	70	0	70	2	1	2	1	2	2	0	1	2	0	0	3	2	1	3	2	2	0	0	0
480	1	2	1	1	8	1	5	2	2	1	2	4	2	1	1	2	0	0	3	2	2	1	1	1	0	0	0
481	1	2	0	0	73	0	73	2	2	1	2	2	2	0	1	2	0	0	2	2	2	3	1	2	0	0	0
482	1	2	0	1	39	1	39	2	2	1	2	2	2	0	1	2	0	0	3	2	2	3	1	1	1	2	1
483	1	1	0	0	64	0	64	2	2	1	1	2	2	0	1	1	0	0	3	2	1	2	1	1	0	0	1
484	1	1	0	0	65	0	65	2	2	1	1	2	2	0	2	2	0	0	1	2	2	2	2	1	0	0	0
485	1	1	0	1	55	1	55	2	2	1	2	3	2	2	1	2	0	0	3	1	2	2	2	1	0	0	0
486	2	1	0	1	58	1	58	2	2	1	1	3	2	2	2	1	0	1	3	1	2	1	2	1	0	0	1
487	1	1	0	0	69	0	69	2	2	1	2	2	2	0	1	1	0	1	3	2	1	3	2	1	0	0	1
488	1	1	0	0	78	0	78	2	2	1	1	3	2	1	2	1	0	0	3	2	1	2	2	1	0	0	1
489	1	2	1	1	3	1	3	2	2	1	2	4	2	0	1	2	0	0	3	2	2	3	1	1	0	0	0
490	2	1	0	0	76	0	76	2	1	1	2	2	2	0	1	2	0	0	2	2	1	1	2	1	1	1	0
491	2	1	0	0	75	0	75	2	2	1	1	3	2	1	1	1	0	1	3	2	1	2	2	1	0	0	1
492	2	2	0	0	74	0	74	2	2	1	2	3	2	1	1	2	0	0	2	1	1	2	1	1	0	0	0
493	2	1	1	1	7	1	5	2	2	1	2	4	1	0	1	2	0	0	1	2	2	2	2	1	0	0	0
494	1	2	1	1	18	1	14	2	2	1	2	4	2	1	1	1	0	0	1	2	2	2	1	1	1	3	0
495	1	2	0	0	78	0	78	2	2	1	2	2	2	0	1	1	0	0	3	2	1	3	1	1	0	0	0
496	1	2	0	0	60	0	60	2	2	1	1	1	1	0	1	2	0	0	3	2	2	2	1	1	1	1	0
497	1	1	1	1	2	1	2	2	2	1	2	4	2	1	1	2	0	0	1	1	2	1	2	1	0	0	0
498	1	1	0	1	27	1	20	2	2	1	2	3	2	2	2	1	1	0	1	2	2	2	2	1	1	2	1
499	1	2	0	1	29	1	29	1	1	1	2	3	2	1	1	1	1	1	3	2	2	1	1	2	0	0	0
500	2	2	0	1	15	1	10	1	1	1	1	3	2	2	2	1	1	1	1	2	2	3	1	2	1	2	0
501	2	1	0	1	20	1	18	1	1	1	1	2	2	0	1	1	0	0	3	2	2	3	2	2	0	0	0
502	1	2	0	0	77	0	77	1	1	1	1	1	1	0	1	1	0	0	2	2	1	3	2	2	0	0	0
503	2	1	0	0	72	0	72	1	1	2	1	1	1	0	2	1	0	0	3	2	1	2	2	2	1	1	0
504	2	1	0	0	69	0	69	1	2	1	1	3	2	1	1	1	0	0	3	2	2	2	2	2	0	0	1
505	2	1	0	0	69	0	69	2	1	1	2	2	2	0	2	2	0	0	3	2	2	3	2	2	0	0	1
506	1	1	0	0	71	0	71	2	1	1	2	3	1	1	2	2	0	1	3	2	1	3	2	2	0	0	1
507	1	2	0	1	21	1	16	2	2	1	2	1	1	0	2	2	0	0	1	2	2	2	1	1	0	0	1
508	2	1	0	0	70	0	70	1	2	1	1	3	2	1	2	1	0	0	3	2	1	2	2	2	0	0	1
509	1	2	0	1	55	1	11	2	2	1	2	2	2	0	2	1	0	0	3	2	1	2	2	1	1	1	1
510	2	2	1	1	38	1	23	2	1	1	2	4	2	0	1	1	0	0	3	2	1	3	1	2	0	0	1
511	2	1	0	0	71	0	71	2	2	1	1	1	1	0	1	2	1	1	3	2	1	1	1	1	0	0	1
512	2	1	0	0	70	0	70	1	2	1	1	2	2	0	1	1	0	0	2	2	1	1	2	2	0	0	1
513	1	1	0	0	62	0	62	1	1	2	1	3	2	1	1	1	0	0	3	2	1	3	2	2	0	0	1
514	2	2	0	0	68	0	68	1	1	2	1	1	1	0	1	2	0	0	1	2	1	3	2	2	0	0	0
515	1	1	0	1	36	1	19	1	1	1	1	2	2	0	2	1	0	0	3	1	2	2	2	2	0	0	1
516	2	2	0	0	64	0	64	1	1	1	1	1	1	0	2	1	0	0	1	2	1	2	2	2	0	0	0
517	1	1	0	0	62	0	62	1	1	2	2	3	2	2	2	2	0	0	3	2	2	3	2	2	0	0	1
518	1	1	0	1	30	1	30	1	1	2	2	2	2	0	2	1	0	0	3	2	1	3	2	2	0	0	0
519	1	1	0	0	73	0	73	2	1	1	1	3	2	1	1	1	0	0	2	2	2	2	1	1	0	0	1
520	1	2	0	0	74	0	74	1	1	2	1	1	1	0	2	1	0	0	2	2	1	2	2	2	0	0	0
521	1	1	0	1	5	1	5	1	2	1	1	1	1	0	1	2	0	0	3	2	2	3	1	2	0	0	1
522	2	2	0	0	62	0	62	1	1	1	1	2	2	0	1	1	0	0	3	2	1	2	2	2	1	2	0
523	1	1	0	0	66	0	66	1	1	1	1	2	2	0	2	1	1	0	3	2	2	2	2	2	0	0	1
524	2	2	0	1	11	1	8	2	1	1	2	3	2	2	1	2	0	0	3	2	1	3	1	2	1	2	1
525	1	1	0	0	75	0	75	1	1	2	1	3	2	1	2	2	0	0	3	2	1	3	2	2	1	2	1
526	2	1	0	0	78	0	78	1	1	2	2	2	2	0	1	2	0	0	3	2	1	2	2	2	0	0	1
527	1	2	0	0	47	0	47	1	1	1	1	2	2	0	1	1	0	0	2	2	2	1	1	2	0	0	0
528	2	2	0	0	70	0	70	1	1	1	2	1	1	0	2	1	0	0	3	2	1	2	2	2	0	0	0
529	2	1	0	0	78	0	78	1	1	1	1	3	2	1	1	1	0	0	3	2	1	2	1	2	0	0	1
530	1	1	0	0	73	0	73	1	1	2	1	3	1	1	2	1	0	0	3	2	1	2	2	2	0	0	1
531	1	1	0	0	67	0	67	1	1	2	2	3	2	1	2	1	0	0	3	2	2	3	2	2	0	0	1
532	2	1	1	0	58	0	58	1	1	2	2	4	2	1	1	2	0	0	3	2	1	2	2	2	0	0	1
533	1	1	0	0	71	0	71	1	1	2	2	1	1	0	2	1	0	0	1	2	2	2	2	2	0	0	1
534	1	1	0	0	66	0	66	1	1	2	1	3	2	2	2	1	0	0	3	2	1	3	2	2	0	0	1
535	2	1	0	1	37	1	37	1	1	1	1	3	2	2	1	1	0	1	3	1	1	2	2	2	1	3	0
536	2	2	0	1	42	1	42	1	2	1	2	2	2	0	1	1	0	0	3	2	2	3	2	2	0	0	1
537	1	2	0	1	36	1	28	2	2	1	1	2	2	0	2	1	0	0	3	2	1	2	2	1	0	0	1
538	2	1	0	0	58	0	58	1	2	1	2	3	1	1	1	2	0	0	2	2	2	2	2	2	0	0	1
539	1	2	0	0	66	0	66	2	2	1	2	3	1	1	2	1	0	0	1	2	2	3	2	2	0	0	1
540	1	1	1	1	15	1	10	2	1	2	2	4	2	1	1	1	0	0	3	2	2	1	2	1	1	2	1
541	1	2	0	0	73	0	73	2	1	1	1	2	2	0	2	1	0	0	3	2	1	2	2	1	0	0	1
542	2	2	0	0	62	0	62	2	1	1	2	3	2	1	1	2	0	0	3	2	1	1	1	1	0	0	1
543	1	2	0	0	66	0	66	2	1	2	2	3	2	1	2	2	0	0	3	1	2	2	2	1	0	0	1
544	1	1	0	1	9	1	8	2	2	1	2	3	2	2	2	1	0	0	1	2	1	2	1	1	0	0	0
545	2	1	1	1	7	1	5	2	2	1	2	4	2	2	1	1	1	1	3	2	1	2	2	1	1	1	0
546	2	2	0	0	60	0	60	2	2	1	2	2	2	0	1	1	0	0	3	2	2	2	2	1	0	0	0
547	1	2	0	0	73	0	73	2	2	1	1	1	1	0	1	1	0	0	2	2	1	3	2	1	1	1	0
548	1	1	0	1	9	1	6	2	2	1	2	3	2	1	1	2	0	0	3	2	2	2	2	1	1	2	1
549	1	2	1	1	36	1	24	2	2	1	2	4	2	0	1	2	0	1	1	2	2	2	1	1	0	0	1
550	2	1	1	0	73	0	73	2	2	1	2	4	2	0	1	1	0	0	3	2	2	1	1	1	0	0	0
551	1	2	0	1	46	1	46	2	2	1	2	2	2	0	1	1	0	0	1	2	2	2	1	1	0	0	0
552	2	1	0	0	62	0	62	2	2	1	2	2	2	0	1	1	0	0	3	2	2	3	1	1	1	1	1
553	2	1	1	1	30	1	25	2	2	1	1	4	2	2	1	2	0	0	3	2	2	1	1	1	0	0	1
554	1	1	0	0	60	0	60	2	2	1	2	2	2	0	2	2	0	0	3	2	2	3	2	1	0	0	0
555	1	1	1	1	26	1	26	2	2	1	2	4	2	1	1	2	0	0	3	2	2	2	2	1	1	1	1
556	2	1	0	1	48	1	48	2	2	1	1	3	2	1	1	1	0	0	3	2	2	1	1	1	1	2	1
557	2	1	0	0	59	0	59	2	2	1	2	3	2	2	1	2	0	1	3	2	2	2	2	1	1	1	1
558	1	1	1	1	18	1	13	2	2	1	2	4	2	2	1	2	0	0	1	2	2	2	2	1	0	0	1
559	1	1	0	0	62	0	62	2	2	1	1	3	2	1	1	2	0	0	1	2	2	3	1	1	0	0	1
560	2	2	1	0	75	1	42	2	2	1	1	4	2	2	1	2	0	0	1	1	2	1	1	1	0	0	0
561	1	2	0	1	8	1	5	2	1	1	1	3	2	2	1	2	1	1	3	2	1	2	2	1	1	1	1
562	2	2	0	1	8	1	4	1	1	1	2	3	2	2	1	1	0	0	3	2	1	2	1	2	0	0	0
563	1	2	0	0	75	0	75	1	1	1	1	2	2	0	2	1	0	0	3	2	1	3	1	2	0	0	1
564	1	2	0	1	48	1	27	1	2	1	1	2	2	0	2	2	0	0	3	2	2	1	1	1	1	1	0
565	1	2	0	0	58	0	58	2	2	1	2	4	2	0	1	2	1	0	3	2	2	1	1	1	0	0	0
566	1	2	0	1	33	1	28	2	2	1	1	2	2	1	1	1	0	0	1	2	2	2	1	1	1	1	1
567	1	2	0	0	76	0	76	1	2	1	1	3	2	1	1	1	0	0	1	2	2	2	1	2	0	0	1
568	1	1	0	1	10	1	10	1	1	2	1	3	2	1	2	1	0	0	3	2	1	2	2	2	1	2	0
569	2	1	0	1	29	1	24	1	1	1	2	2	2	0	1	1	0	0	3	2	1	2	1	2	0	0	0
570	2	2	0	1	20	1	20	1	1	1	1	1	1	0	1	1	0	0	1	2	1	2	1	2	0	0	0
571	1	2	0	0	78	0	78	1	1	1	1	3	1	1	1	2	1	0	3	2	1	3	2	2	1	3	0
572	2	2	0	1	33	1	30	1	1	2	1	3	2	1	2	1	0	0	3	2	1	2	2	2	0	0	0
573	1	2	0	0	66	0	66	1	1	1	1	1	1	0	2	1	0	0	3	2	1	3	1	2	1	2	0
574	2	1	1	1	17	1	13	1	2	1	2	4	2	0	1	2	0	0	3	2	2	1	2	2	0	0	1
575	1	1	0	1	28	1	16	1	1	2	1	2	2	0	1	2	1	1	3	2	2	3	2	2	0	0	1
576	1	1	1	1	30	1	25	2	2	2	1	4	2	2	2	2	0	0	3	2	1	3	2	2	0	0	1
577	1	1	0	0	74	0	74	1	1	1	1	2	2	0	2	2	0	0	2	2	1	3	2	2	0	0	1
578	2	1	0	0	72	0	72	2	2	1	1	2	2	0	2	2	0	0	2	2	1	1	1	2	0	0	1
579	1	2	0	1	21	1	17	2	1	1	1	3	2	1	1	2	0	0	1	2	1	3	2	2	0	0	1
580	1	1	0	1	20	1	15	2	1	1	1	2	2	0	1	2	0	0	2	2	1	2	2	1	0	0	0
581	1	1	0	0	80	0	80	2	1	2	1	3	2	1	1	1	0	0	3	2	1	3	2	2	0	0	1
582	1	2	0	0	72	0	72	2	1	1	1	2	2	0	2	2	0	0	3	2	2	1	1	1	0	0	0
583	1	1	1	1	8	1	6	2	2	1	2	4	2	2	1	2	0	0	2	2	1	2	1	1	0	0	1
584	1	2	0	1	17	1	17	2	2	1	1	1	1	0	2	2	0	0	1	2	1	1	1	1	1	3	0
585	1	1	1	1	9	1	5	2	2	1	2	4	2	0	2	2	0	0	2	2	2	2	2	1	0	0	0
586	2	2	0	0	64	0	64	2	2	1	1	2	2	0	2	2	1	1	3	2	2	2	1	2	0	0	1
587	1	2	0	0	79	0	79	2	1	1	1	1	1	0	2	1	0	0	1	2	1	2	2	1	0	0	0
588	1	2	0	0	75	0	75	2	2	1	2	1	1	0	2	1	0	0	2	2	1	3	1	1	1	2	0
589	1	2	0	1	43	1	43	2	2	1	2	2	2	0	1	1	0	0	3	1	2	3	1	1	0	0	0
590	1	2	0	0	75	0	75	2	2	1	2	3	2	1	1	2	0	0	3	2	2	2	1	1	1	2	0
591	2	2	1	1	15	1	7	2	2	1	1	4	2	2	1	2	0	0	2	1	2	3	1	1	0	0	1
592	1	1	0	1	6	1	4	1	1	2	1	3	2	2	1	1	0	0	2	1	2	2	2	2	0	0	0
593	1	2	0	0	79	0	79	1	1	1	1	2	2	0	1	2	0	0	1	2	1	3	1	2	0	0	1
594	1	1	0	0	67	0	67	1	1	2	1	2	2	0	1	2	0	0	3	2	2	2	2	2	0	0	1
595	1	1	0	0	60	0	60	1	1	2	2	3	2	1	2	1	0	0	3	2	1	3	2	2	0	0	1
596	2	2	0	1	33	1	33	2	1	1	2	3	2	1	2	1	0	0	2	2	1	2	1	1	0	0	1
597	1	2	0	0	70	0	70	2	2	1	2	3	2	1	1	2	0	0	1	2	2	1	1	1	0	0	1
598	1	1	0	0	69	0	69	1	1	2	1	2	2	0	2	1	0	0	2	2	2	3	2	2	0	0	0
599	2	1	0	1	24	1	24	1	1	2	1	2	2	0	2	1	0	0	3	2	1	2	2	2	0	0	1
600	1	2	0	0	74	0	74	1	1	1	1	3	2	1	1	2	0	0	3	2	1	2	2	2	0	0	1
601	1	2	0	0	77	0	77	1	1	1	1	2	2	0	1	1	0	0	1	2	1	2	2	2	0	0	1
602	1	2	0	1	69	1	69	1	1	1	1	2	2	0	1	1	0	0	1	2	2	1	1	2	1	1	1
603	1	2	0	1	36	1	36	1	1	2	2	2	2	0	1	1	0	0	3	2	1	3	2	2	1	1	1
604	1	2	0	0	69	0	69	2	1	1	1	1	1	0	1	1	0	0	1	2	2	3	2	2	0	0	0
605	1	2	0	0	72	0	72	2	1	2	1	2	2	0	1	2	0	0	3	2	1	2	2	1	0	0	1
606	2	2	0	1	1	1	1	2	2	1	1	2	2	0	1	1	0	0	3	2	2	2	2	1	1	5	0
607	1	2	0	1	16	1	10	1	1	2	2	3	2	1	2	1	0	0	3	2	1	3	2	2	1	2	1
608	2	2	0	0	62	0	62	2	1	1	1	1	1	0	2	1	0	0	1	2	2	2	2	2	1	3	0
609	1	1	0	1	10	1	10	1	1	1	1	3	2	2	2	1	1	1	1	2	2	3	2	2	0	0	0
610	1	2	0	1	27	1	15	1	1	1	1	3	2	1	2	2	0	0	1	2	2	2	1	2	0	0	0
611	1	1	1	1	10	1	8	2	1	1	1	4	2	0	1	2	0	0	1	2	2	1	1	1	0	0	1
612	1	2	1	1	23	1	18	2	2	1	2	4	2	1	1	2	0	0	3	2	1	2	2	1	1	1	1
613	1	1	1	1	9	1	9	2	1	1	2	4	2	2	1	2	0	0	2	1	2	2	2	1	0	0	1
614	1	2	1	1	21	1	18	2	2	1	2	4	2	0	1	2	0	0	1	2	2	3	1	1	1	2	1
615	1	1	0	1	12	1	12	2	2	1	2	3	2	2	1	2	0	0	3	2	2	3	1	1	0	0	0
616	1	2	0	1	24	1	19	2	2	1	2	3	2	1	1	1	0	0	3	1	2	3	1	1	0	0	1
617	1	2	0	0	69	0	69	2	2	1	2	1	1	0	1	2	0	0	3	2	2	2	1	1	0	0	1
618	1	1	0	1	25	1	9	2	2	1	1	3	2	1	1	1	1	1	2	2	1	3	1	1	0	0	1
619	1	1	1	1	60	1	47	2	2	1	2	4	2	2	1	1	0	0	2	2	1	2	2	1	0	0	1
620	2	2	0	0	61	0	61	1	1	2	1	2	2	0	1	1	0	0	3	2	1	2	2	2	1	2	1
621	1	2	1	1	41	1	34	1	1	1	2	4	2	0	1	1	0	0	3	2	1	3	2	2	0	0	1
622	1	1	0	0	63	0	63	1	1	1	1	1	1	0	1	1	0	0	2	2	1	2	2	2	0	0	1
623	1	2	0	0	67	0	67	1	1	1	1	2	2	0	2	1	0	0	3	2	1	2	2	2	0	0	1
624	2	1	0	1	39	1	39	1	1	1	1	3	2	2	2	1	0	1	3	2	1	2	2	2	0	0	0
625	1	2	0	1	59	1	47	2	2	1	1	3	2	1	1	1	0	0	3	2	1	2	2	1	1	2	0
626	1	1	0	1	31	1	29	2	2	1	2	3	1	1	2	1	0	0	3	2	1	3	2	1	0	0	1
627	1	2	0	0	59	0	59	2	2	1	2	3	2	1	1	2	0	0	3	2	2	2	2	2	0	0	0
628	1	2	0	0	70	0	70	2	1	1	2	2	2	0	2	1	0	0	3	2	2	2	1	1	1	4	0
629	1	2	0	0	72	0	72	2	2	1	1	2	2	0	1	1	0	0	3	2	2	2	1	1	0	0	1
630	1	1	0	1	9	1	5	2	2	1	2	3	2	2	1	1	0	1	3	2	2	3	2	1	0	0	1
631	1	1	0	1	6	1	5	2	2	1	1	1	1	0	2	2	0	0	1	2	2	3	2	1	0	0	1
632	2	2	1	1	14	1	10	2	2	1	2	4	2	1	1	2	1	1	3	2	2	3	1	1	1	1	1
633	1	2	1	1	9	1	3	1	1	1	2	4	2	1	2	1	1	0	3	2	1	2	2	2	1	2	1
634	1	2	0	0	75	0	75	2	1	1	1	1	1	0	1	1	0	0	3	2	2	1	1	1	1	3	0
635	2	1	0	0	60	0	60	2	2	1	2	2	2	0	1	2	0	0	1	2	2	2	2	2	0	0	1
636	1	1	0	0	74	0	74	2	2	1	2	3	2	1	2	2	0	1	1	2	2	1	2	1	1	3	1
637	1	2	1	1	6	1	4	2	2	1	2	4	2	2	1	1	0	1	3	2	1	2	1	1	1	4	0
638	2	1	0	0	72	1	70	2	2	1	2	1	1	0	1	2	0	0	3	2	2	2	1	1	0	0	0
639	2	1	0	0	65	0	65	1	1	1	1	1	1	0	1	1	0	0	3	2	1	3	2	2	1	1	1
640	1	2	0	0	73	0	73	1	1	2	1	1	1	0	1	1	0	0	1	2	1	2	2	2	0	0	1
641	2	1	1	1	21	1	15	1	1	1	2	4	2	2	2	2	0	1	3	2	1	2	2	2	0	0	1
642	1	2	0	1	8	1	7	1	1	1	2	3	2	1	1	1	0	0	3	1	2	2	2	2	1	1	0
643	1	1	0	0	64	0	64	2	1	1	2	1	1	0	2	2	0	0	3	2	1	3	1	1	1	2	0
644	1	1	0	1	30	1	30	2	1	2	1	2	2	0	1	1	1	1	1	2	1	3	2	2	0	0	1
645	2	1	0	1	15	1	10	2	2	1	2	3	2	2	2	2	0	1	2	2	2	1	1	1	0	0	1
646	1	2	1	1	30	1	3	2	2	1	1	4	2	1	1	2	0	0	2	2	1	2	2	1	1	2	0
647	2	1	1	0	79	1	48	2	2	1	1	4	2	0	1	1	0	0	3	1	2	2	1	1	0	0	1
648	2	2	0	1	46	1	40	2	1	1	2	2	2	0	2	2	0	0	1	2	1	2	1	2	0	0	0
649	2	2	0	1	10	1	6	2	2	1	2	1	1	0	1	2	0	0	1	2	2	1	1	1	0	0	0
650	1	1	0	1	21	1	17	2	1	2	1	3	2	2	2	1	0	0	3	1	2	2	2	2	0	0	1
651	1	1	0	0	68	0	68	1	1	1	2	2	2	0	2	1	0	0	3	2	2	2	1	2	1	1	1
652	2	1	0	0	65	0	65	2	2	1	2	3	2	1	1	1	0	0	3	2	1	2	1	2	1	1	0
653	1	2	0	0	74	0	74	2	2	1	1	2	2	0	1	2	0	0	1	2	1	2	1	1	1	4	0
654	1	1	0	1	25	1	10	1	2	2	1	3	2	2	1	1	0	1	3	1	2	3	2	2	0	0	1
655	2	1	1	1	21	1	16	2	2	1	2	4	2	2	1	1	0	1	3	2	2	2	2	1	1	1	0
656	1	1	1	1	9	1	7	2	2	1	2	4	2	2	1	2	0	1	3	2	2	3	2	1	0	0	0
657	2	2	1	1	7	1	5	1	1	1	2	4	2	1	1	2	0	0	3	2	2	3	2	2	0	0	0
658	1	1	0	0	77	0	77	1	1	1	1	2	2	0	2	1	0	0	3	2	2	2	1	2	0	0	0
659	1	2	0	0	59	0	59	2	2	1	2	2	2	0	1	2	0	0	3	2	1	1	2	1	0	0	0
660	1	2	0	1	12	1	12	1	2	1	1	2	2	0	2	2	0	0	3	2	1	2	2	2	0	0	0
661	1	1	0	0	72	0	72	2	2	1	1	2	2	0	2	2	0	0	1	1	2	2	1	1	0	0	0
662	1	1	0	0	76	0	76	1	1	2	2	3	2	1	1	1	0	0	3	2	1	2	2	2	1	2	1
